# Supplementary material for: A small-molecule inhibitor of skeletal muscle myosin II
Source: Springer Nature journal article supplement (doi:10.1038/ncb734), 2001-12-17
Supplement: 41556_2002_BFncb734_MOESM1_ESM.pdf [file 41556_2002_BFncb734_MOESM1_ESM.pdf]

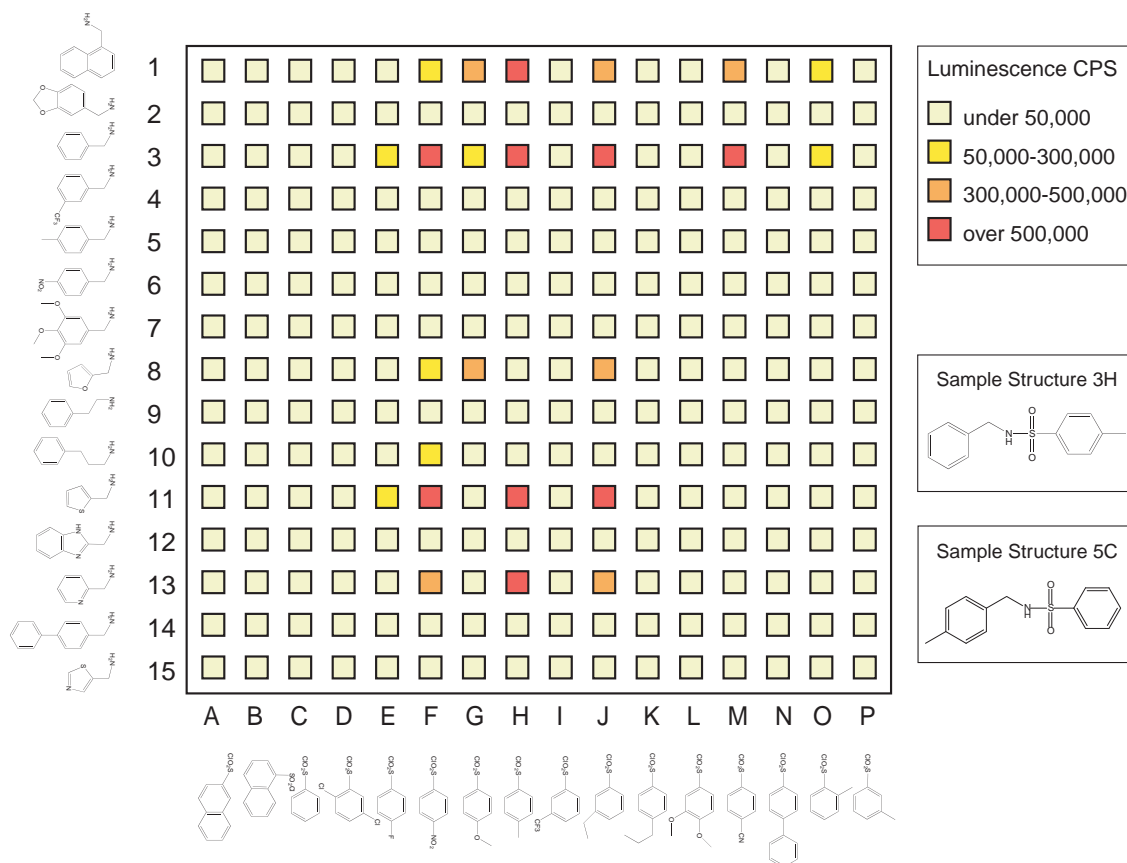

Figure S1 **Synthesis and characterization of the sulfonamide mini-library.** Amines (1–15) and sulfonyl chlorides (A–P) were reacted to synthesize 240 com-

pounds related to BTS (3H). Relative level of inhibition is colour encoded (top right).

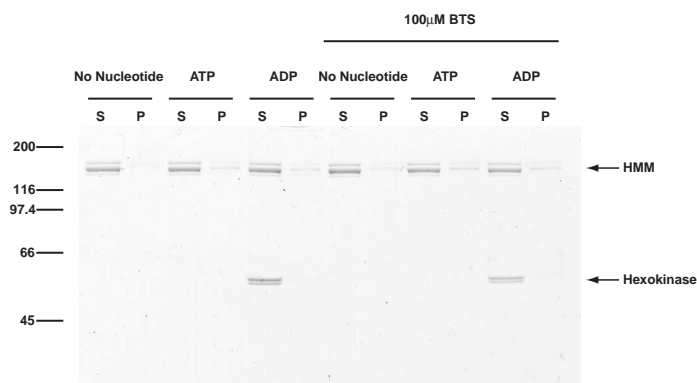

Figure S2 **HMM Sedimentation in the absence of F-actin** as described in Fig. 2c.
